# Supplementary material for: Hypothermic stunning of green sea turtles in a western Gulf of Mexico foraging habitat
Source: PubMed Central journal article supplement (PMC5357020; doi:10.1371/journal.pone.0173920), 2017-03-17
Supplement: pone.0173920.s001.pdf [file pone.0173920.s001.pdf]

**S1 Table. Cross correlations between environmental parameters measured at the Bird Island Basin station and seven other TCOON/NWLON monitoring stations throughout the Laguna Madre in south Texas from the winters of 1995–1996 through 2014–2015 (all p-values at 0; no lags included).** Associations computed based on available measurements with time series spans varying depending on station location and environmental parameter. Pearson correlation coefficients were used for non-directional variables and circular-circular correlation coefficients [92] were used for wind direction correlations.

| Environmental Parameter | Packery Channel | Bob Hall Pier | Baffin Bay | Rincon del San Jose | Port Mansfield | Realitos | SPI Coast Guard |
|-------------------------|-----------------|---------------|------------|---------------------|----------------|----------|-----------------|
| Water Temperature       | 0.96            | 0.94          | 0.96       | 0.95                | 0.96           | 0.96     | 0.90            |
| Air Temperature         | 0.99            | 0.98          | 0.99       | 0.98                | 0.97           | 0.97     | 0.97            |
| Water Level             | 0.93            | 0.46          | 0.96       | 0.57                | 0.85           | 0.69     | 0.51            |
| Wind Speed              | 0.86            | 0.80          | 0.87       | 0.76                | 0.48           | 0.68     | 0.48            |
| Wind Gust               | 0.89            | 0.81          | 0.88       | 0.77                | 0.57           | 0.71     | 0.63            |
| Wind Direction          | 0.91            | 0.90          | 0.87       | 0.73                | 0.71           | 0.77     | 0.69            |
| Barometric Pressure     | 1.00            | 1.00          | 1.00       | 0.97                | 1.00           | 0.99     | 0.96            |
