# Supplementary material for: Hypothermic stunning of green sea turtles in a western Gulf of Mexico foraging habitat
Source: PubMed Central journal article supplement (PMC5357020; doi:10.1371/journal.pone.0173920), 2017-03-17
Supplement: pone.0173920.s002.pdf [file pone.0173920.s002.pdf]

**S2 Table. Summary of stranded turtles with date, duration of the event, and mean water temperature of the initial two consecutive cold days of the events in the environmental parameter analysis.**

| Combined Number of Turtles Recorded Per Event | Start Date | Duration of Event (Number of Days) | Consecutive 2-Day Mean Water Temperature (°C) |
|-----------------------------------------------|------------|------------------------------------|-----------------------------------------------|
| 1168                                          | 2/1/2011   | 8                                  | 5.8                                           |
| 292                                           | 1/3/2015   | 17                                 | NA                                            |
| 240                                           | 12/5/2013  | 13                                 | 8.6                                           |
| 239                                           | 1/6/2010   | 12                                 | 6.4                                           |
| 229                                           | 2/6/2014   | 9                                  | 8.4                                           |
| 199                                           | 2/10/2011  | 8                                  | 8.5                                           |
| 198                                           | 1/6/2014   | 12                                 | 7.0                                           |
| 181                                           | 1/22/2014  | 13                                 | 10.5                                          |
| 146                                           | 1/17/2007  | 21                                 | 6.8                                           |
| 145                                           | 11/13/2014 | 13                                 | 9.9                                           |
| 58                                            | 1/13/1997  | 11                                 | 2.5                                           |
| 50                                            | 12/25/2005 | 9                                  | 5.8                                           |
| 48                                            | 11/25/2013 | 6                                  | 11.1                                          |
| 44                                            | 2/4/1996   | 4                                  | 4.0                                           |
| 15                                            | 12/28/2001 | 9                                  | 8.4                                           |
| 14                                            | 12/26/1999 | 14                                 | NA                                            |
| 13                                            | 1/15/2013  | 8                                  | 11.2                                          |
| 13                                            | 12/28/2014 | 7                                  | 11.1                                          |
| 12                                            | 12/14/2000 | 9                                  | 8.4                                           |
| 10                                            | 1/12/2011  | 3                                  | 9.7                                           |
| 7                                             | 1/5/2013   | 3                                  | 11.5                                          |
| 5                                             | 12/26/2012 | 5                                  | 15.3                                          |
| 4                                             | 1/2/2002   | 5                                  | 7.1                                           |
| 4                                             | 12/5/2009  | 3                                  | 9.3                                           |
| 4                                             | 12/4/2000  | 5                                  | 9.2                                           |
| 4                                             | 2/24/2015  | 3                                  | 11.2                                          |
| 3                                             | 1/19/1996  | 1                                  | 8.3                                           |
| 3                                             | 3/6/2015   | 1                                  | NA                                            |
| 2                                             | 12/23/2013 | 2                                  | 14.7                                          |
| 2                                             | 2/23/2014  | 2                                  | 19.5                                          |
| 2                                             | 1/25/2015  | 2                                  | 12.3                                          |
| 2                                             | 12/26/1995 | 2                                  | 7.7                                           |
| 24                                            | NA         | 1 <sup>1</sup>                     | NA                                            |

<sup>1</sup>1 Day events with 1 stranded turtle recorded from 1996 through 2014
